# Supplementary material for: Exosomal miR-452-5p Induce M2 Macrophage Polarization to Accelerate Hepatocellular Carcinoma Progression by Targeting TIMP3
Source: Hindawi journal article supplement (doi:10.1155/2022/1032106), 2022-09-16

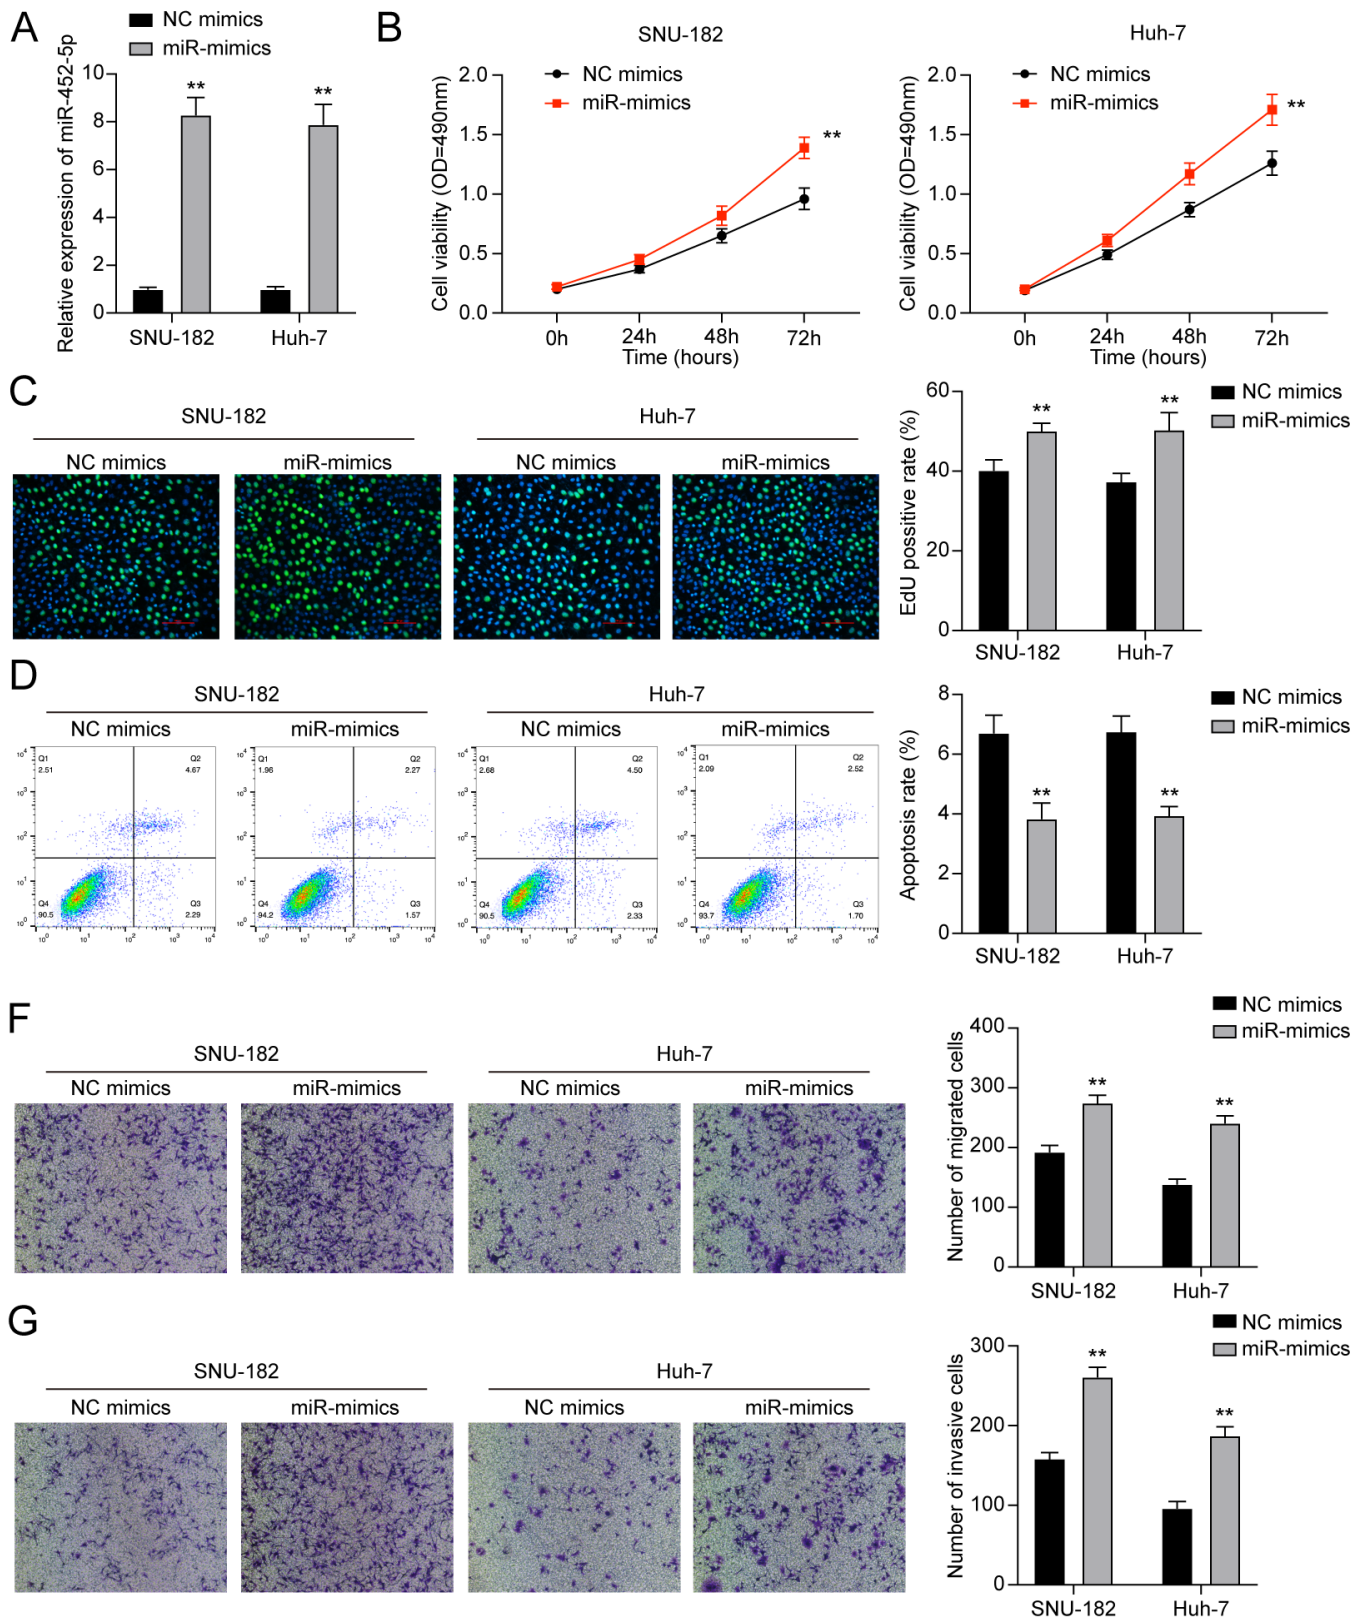

Supplement: f1 [file 1032106.f1.pdf]
