# Supplementary material for: Exosomal miR-452-5p Induce M2 Macrophage Polarization to Accelerate Hepatocellular Carcinoma Progression by Targeting TIMP3
Source: Hindawi journal article supplement (doi:10.1155/2022/1032106), 2022-09-16

**A**

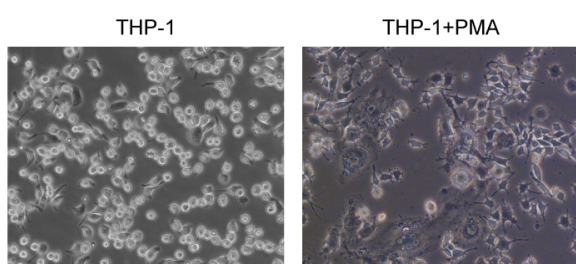

**B**

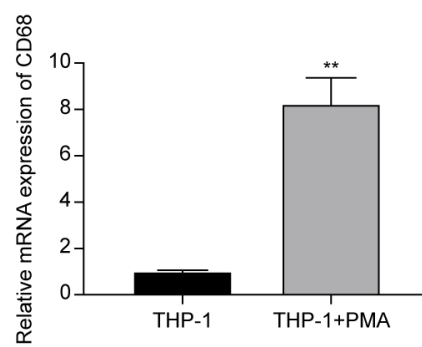

Supplement: f2 [file 1032106.f2.pdf]
