# Supplementary material for: Exosomal miR-452-5p Induce M2 Macrophage Polarization to Accelerate Hepatocellular Carcinoma Progression by Targeting TIMP3
Source: Hindawi journal article supplement (doi:10.1155/2022/1032106), 2022-09-16
Supplement: f3 [file 1032106.f3.pdf]

**Table S1 Primers list**

| Gene         | Forward Primer (5'-3')  | Reverse Primer (5'-3')     |
|--------------|-------------------------|----------------------------|
| miR-452-5p   | AGCGCGAACTGTTTGCAGAGGA  | ATCCAGTGCAGGGTCCGAGG       |
| CD68         | CTTCTCTCATTCCCCTATGGACA | GAAGGACACATTGTACTCCA<br>CC |
| CD206        | GACGTGGCTGTGGATAAATAAC  | CAGAAGACGCATGTAAAGCT<br>AC |
| Arg-1        | AGACCACAGTTTGGCAATTGG   | AGGAGAATCCTGGCACATCG       |
| IL-10        | GTTGTAAAGGAGTCCTTGCTG   | TTCACAGGGAAGAAATCGAT<br>GA |
| iNOS         | GCTCTACACCTCCAATGTGACC  | CTGCCGAGATTTGAGCCTCAT<br>G |
| IL-1 $\beta$ | GCCAGTGAAATGATGGCTTATT  | AGGAGCACTTCATCTGTTTAG<br>G |
| TIMP3        | GTGCAACTTCGTGGAGAGGTT   | CAGGTAGCAGGACTTGATCT<br>TG |
| GAPDH        | AACGGATTTGGTCGTATTGG    | TTGATTTTGGAGGGATCTCG       |
| U6           | CTCGCTTCGGCAGCACA       | AACGCTTCACGAATTGCGT        |
