# Supplementary material for: Exosomal miR-452-5p Induce M2 Macrophage Polarization to Accelerate Hepatocellular Carcinoma Progression by Targeting TIMP3
Source: Hindawi journal article supplement (doi:10.1155/2022/1032106), 2022-09-16
Supplement: f4 [file 1032106.f4.pdf]

**Table S2 Primary antibodies for western blot**

| <b>Antibody</b> | <b>Concentration</b> | <b>Specificity</b>   | <b>Catalog number</b> | <b>Company</b>               |
|-----------------|----------------------|----------------------|-----------------------|------------------------------|
| TSG101          | 1/2000               | Rabbit<br>monoclonal | ab125011              | Abcam                        |
| CD9             | 1/2000               | Rabbit<br>monoclonal | 13403                 | Cell Signaling<br>Technology |
| Alix            | 1/2500               | Rabbit<br>monoclonal | 92880                 | Cell Signaling<br>Technology |
| TIMP3           | 1/2000               | Rabbit<br>monoclonal | 5673                  | Cell Signaling<br>Technology |
| GAPDH           | 1/2500               | Rabbit polyclonal    | ab9485                | Abcam                        |
