# Supplementary material for: Exosomal miR-452-5p Induce M2 Macrophage Polarization to Accelerate Hepatocellular Carcinoma Progression by Targeting TIMP3
Source: Hindawi journal article supplement (doi:10.1155/2022/1032106), 2022-09-16
Supplement: f5 [file 1032106.f5.pdf]

**Table S3 Gene Ontologies analysis of the 226 genes**

| <b>Term</b>                                                                                  | <b>P-value</b> |
|----------------------------------------------------------------------------------------------|----------------|
| <b>GO Biological Process</b>                                                                 |                |
| regulation of transcription by RNA polymerase II (GO:0006357)                                | 1.83E-07       |
| regulation of transcription, DNA-templated (GO:0006355)                                      | 3.13E-07       |
| positive regulation of transcription, DNA-templated (GO:0045893)                             | 1.43E-06       |
| positive regulation of transcription by RNA polymerase II (GO:0045944)                       | 1.32E-05       |
| regulation of calcium ion transport (GO:0051924)                                             | 4.83E-05       |
| negative regulation of calcium ion transport (GO:0051926)                                    | 5.39E-05       |
| negative regulation of transcription, DNA-templated (GO:0045892)                             | 7.50E-05       |
| negative regulation of gene expression (GO:0010629)                                          | 8.10E-05       |
| cellular protein modification process (GO:0006464)                                           | 1.01E-04       |
| negative regulation of transcription by RNA polymerase II (GO:0000122)                       | 1.04E-04       |
| cellular response to decreased oxygen levels (GO:0036294)                                    | 1.29E-04       |
| nervous system development (GO:0007399)                                                      | 1.82E-04       |
| transcription by RNA polymerase II (GO:0006366)                                              | 2.99E-04       |
| membrane lipid biosynthetic process (GO:0046467)                                             | 4.96E-04       |
| axon guidance (GO:0007411)                                                                   | 5.20E-04       |
| endoderm development (GO:0007492)                                                            | 5.86E-04       |
| phosphorylation (GO:0016310)                                                                 | 6.60E-04       |
| positive regulation of nucleic acid-templated transcription (GO:1903508)                     | 7.41E-04       |
| tail-anchored membrane protein insertion into ER membrane (GO:0071816)                       | 8.61E-04       |
| negative regulation of insulin secretion (GO:0046676)                                        | 8.61E-04       |
| negative regulation of histone H3-K27 methylation (GO:0061086)                               | 0.001243044    |
| negative regulation of metallopeptidase activity (GO:1905049)                                | 0.001243044    |
| regulation of ubiquitin-dependent protein catabolic process (GO:2000058)                     | 0.001269089    |
| <b>GO Molecular Function</b>                                                                 |                |
| transcription coregulator binding (GO:0001221)                                               | 3.25E-04       |
| nuclear import signal receptor activity (GO:0061608)                                         | 7.15E-04       |
| double-stranded DNA binding (GO:0003690)                                                     | 0.001218734    |
| RNA polymerase II cis-regulatory region sequence-specific DNA binding (GO:0001222)           | 0.001308305    |
| transcription coactivator binding (GO:0001223)                                               | 0.001408196    |
| cyclin-dependent protein serine/threonine kinase regulator activity (GO:0016538)             | 0.001512321    |
| nuclear localization sequence binding (GO:0008139)                                           | 0.002418378    |
| calcium-dependent protein serine/threonine phosphatase activity (GO:0004723)                 | 0.002571685    |
| DNA-binding transcription factor binding (GO:0140297)                                        | 0.002585174    |
| cis-regulatory region sequence-specific DNA binding (GO:0000987)                             | 0.002781721    |
| sequence-specific DNA binding (GO:0043565)                                                   | 0.002890471    |
| transcription cis-regulatory region binding (GO:0000976)                                     | 0.004002936    |
| histone deacetylase binding (GO:0042826)                                                     | 0.004093295    |
| transcription corepressor binding (GO:0001222)                                               | 0.004188619    |
| double-stranded telomeric DNA binding (GO:0003691)                                           | 0.004343344    |
| RNA binding (GO:0003723)                                                                     | 0.004842504    |
| RNA polymerase II transcription regulatory region sequence-specific DNA binding (GO:0001222) | 0.005955587    |
| <b>GO Cellular Component</b>                                                                 |                |
| intracellular membrane-bounded organelle (GO:0043231)                                        | 4.38E-08       |
| nucleus (GO:0005634)                                                                         | 3.24E-07       |

**Adjusted P-v.Odds Ratio Combined ScGenes**

|             |             |             |                                           |
|-------------|-------------|-------------|-------------------------------------------|
| 2.80E-04    | 2.444636549 | 37.92336197 | ARF4;CCNT2;THRB;ZBTB20;HMGB3;TCF20;RORA;  |
| 2.80E-04    | 2.397076097 | 35.89742494 | TENM1;CDKN1B;CCNT2;HP1BP3;ZBTB20;HMGB3;   |
| 8.54E-04    | 2.769056094 | 37.25778698 | ARF4;CCNT2;THRB;TCF20;RORA;HOXC13;RPS6KA  |
| 0.005918659 | 2.784535147 | 31.27490911 | ARF4;CCNT2;THRB;TCF20;RORA;SUPT6H;RPS6KA  |
| 0.016040187 | 10.34370629 | 102.8004246 | STIM2;CACNA2D1;STC1;ATP2B1;CAMK2G;ADRA2   |
| 0.016040187 | 23.73453453 | 233.2912981 | STC1;SLC30A1;TMBIM6;ADRA2A                |
| 0.018082871 | 2.540251074 | 24.12689685 | CDKN1B;THRB;BMI1;PHF6;PHF21A;PURA;HMBOX   |
| 0.018082871 | 3.844675388 | 36.22315554 | MEF2C;SAMD4A;ATP2B1;BMI1;CRKL;VEGFA;AEB   |
| 0.018661263 | 2.443193193 | 22.48446632 | ARF4;DYRK2;SDC2;DCUN1D1;PTPRJ;LAMC1;PPP2  |
| 0.018661263 | 2.794186455 | 25.61434588 | SMAD2;KLF10;MEF2C;DR1;KLF12;THRB;BMI1;PHF |
| 0.020952144 | 8.532900433 | 76.4199102  | NPEPPS;HP1BP3;PGK1;RORA;HIPK2;VEGFA       |
| 0.027160768 | 3.182925224 | 27.40297638 | ROBO2;TENM1;MEF2C;RYK;BDNF;TMOD2;DYRK1    |
| 0.041157134 | 3.543998058 | 28.75494473 | CCNT2;THRB;COPS2;LHX1;TRIM24;RORA;ESRRG;  |
| 0.061968003 | 8.418423973 | 64.05255104 | CERS6;SAMD8;SPTLC2;VAPB;ST3GAL2           |
| 0.061968003 | 4.185947076 | 31.65153825 | ROBO2;KLF7;RYK;BDNF;LHX1;CHN1;DAG1;MAPK   |
| 0.065444629 | 22.15470852 | 164.8810046 | LHX1;LAMC1;SOX7                           |
| 0.069335988 | 3.057478376 | 22.39257833 | DYRK2;RYK;DYRK1A;PRPF4B;HIPK2;PPP3CB;COP  |
| 0.073609893 | 2.763052286 | 19.9130349  | SMAD2;MEF2C;DYRK1A;RORA;ESRRG;HOXC13;IN   |
| 0.076951282 | 18.98782832 | 133.9998386 | CAMLG;MMGT1;EMC8                          |
| 0.076951282 | 18.98782832 | 133.9998386 | KLF7;KCNB1;ADRA2A                         |
| 0.098602694 | 58.8422619  | 393.6660514 | MTF2;SUPT6H                               |
| 0.098602694 | 58.8422619  | 393.6660514 | TIMP2;TIMP3                               |
| 0.098602694 | 9.357989569 | 62.41269966 | RNF139;UBE3A;RAD23B;HIPK2                 |
| 0.070070865 | 9.297699849 | 74.66853137 | CCNT2;THRB;MTF2;RORA;ZNF644               |
| 0.070070865 | 20.44946533 | 148.1146665 | KPNA4;RANBP6;TNPO1                        |
| 0.070070865 | 2.455586917 | 16.47684744 | SMAD2;KLF10;FOXB1;MEF2C;KLF12;THRB;ZBTB2  |
| 0.070070865 | 2.063747101 | 13.7012648  | THRB;ZBTB20;RORA;HOXC13;CHD2;HOXA3;TRIM   |
| 0.070070865 | 15.63466104 | 102.6485165 | CCNT2;THRB;RORA                           |
| 0.070070865 | 8.889189189 | 57.72737097 | CCNT2;CDKN1B;CNPPD1;CCNO                  |
| 0.073050089 | 12.65406791 | 76.23643531 | KPNA4;RANBP6;TNPO1                        |
| 0.073050089 | 35.30178571 | 210.5113973 | PPP3CB;CAMK2G                             |
| 0.073050089 | 3.591559633 | 21.39837729 | SMAD2;RERE;PURA;MEF2C;HOXC13;GABPA;HIPK   |
| 0.073050089 | 1.969531353 | 11.59007255 | SMAD2;KLF10;FOXB1;MEF2C;KLF12;THRB;ZBTB2  |
| 0.073050089 | 2.249691422 | 13.15245142 | KLF10;FOXB1;MEF2C;KLF12;THRB;ZBTB20;RORA; |
| 0.080496649 | 2.374766355 | 13.11043731 | SMAD2;KLF10;MEF2C;DR1;ZBTB20;RORA;HOXC13  |
| 0.080496649 | 5.061188811 | 27.82846589 | MEF2C;BRMS1L;PKN2;PHF6;DACT1              |
| 0.080496649 | 10.21800621 | 55.94751019 | MTF2;RORA;ZNF644                          |
| 0.080496649 | 25.2130102  | 137.1363519 | PURA;HMBOX1                               |
| 0.084138514 | 1.809865134 | 9.647166215 | RBM28;PPP1R10;CELF2;IREB2;HMGB3;TCF20;CHD |
| 0.09739136  | 1.798447112 | 9.214209876 | THRB;ZBTB20;RORA;HOXC13;CHD2;PURA;HOXA3   |
| 7.48E-06    | 2.126989494 | 36.04067415 | RERE;TENM1;CDKN1B;CCNT2;DYRK2;THRB;PPP1   |
| 2.77E-05    | 2.066927017 | 30.88524164 | RERE;TENM1;CDKN1B;CCNT2;DYRK2;THRB;PPP1   |

HOXC13;BMI1;CHD2;PHF6;RPS6KA3;PPP3CB;HOXA3;ZNF644;TEAD1;RNF111;GABPA;SOX7;TCF20;RORA;HOXC13;CHD2;PHF6;ELAVL2;RPS6KA3;PPP3CB;HOXA3;ZNF644;SOX7;TEAD1;PPP3CB;SERTAD2;E2F3;TEAD1;RNF111;GABPA;WNT4;SMAD2;ACTR3;KLF10;ZNF462;MEF2C;PPP3CB;E2F3;TEAD1;RNF111;GABPA;SMAD2;ACTR3;KLF10;ZNF462;MEF2C;DR1;SMARCA4

SOX7;ZNF148;SOX7;WNT4;DACT1;SMAD2;KLF10;MEF2C;DR1;KLF12;FOXP2;VEGFA;KLF7;LHX1;P2;RNF139;MTF2;TMBIM6;IGF2BP2;ZNF148;WNT4;RORA;PPP3CB;CAND1;TLK1;MAPK1;ST3GAL2;SKP1;SOCS5;RYK;DYRK1A;PRPF4B;FBXO11;KLF7;FOXP2;PHF21A;VEGFA;PURA;KLF7;HMBOX1;BRMS1L;MTF2;ZNF148;MXD1;FRK;DACT1

SOX7;INHBA;VEGFA;RPS6KA3;NAV3;LHX1;IGF2BP2;TEAD1;DACT1;E2F3;INTS8;TEAD1;SUPT6H;SOX5

SOX7;VEGFA

SOX7;PGK1;TLK1;MAPK1;PKN2;XYLB;FRK;INHBA;RGMB;HIPK2;PPP3CB;LHX1;NAA15;TEAD1;RNF111;WNT4

SOX7;HMGB3;ESRRG;HOXC13;PURA;HMBOX1;LHX1;E2F3;SOX7;TEAD1;GABPA;SOX7;TEAD1;E2F3;ZNF644;ZNF148;SOX7;TEAD1;GABPA;ZKSCAN1;SOX5;ZBTB7C;SMAD2;KLF10;FOXP2

SOX7;DACT1;RORA;ESRRG;HOXC13;CHD2;FOXP2;KLF7;HOXA3;E2F3;ZNF644;ZNF148;MXD1;SOX7;TEAD1;ESRRG;HOXC13;FOXP2;HMBOX1;LHX1;E2F3;ZNF148;SOX7;TEAD1;GABPA;PURA;LHX1;E2F3;SOX7;TEAD1;GABPA;SOX5

SOX7;PHF6;BZW1;SUPT6H;ELAVL2;CRKL;PURA;IGF2BP2;TNPO1;SF3B1;AGFG1;SPATS2;SAMHD1;E2F3;ZNF644;ZNF148;SOX7;TEAD1;GABPA;ZKSCAN1;SOX5;ZBTB7C;SMAD2;KLF10;FOXP2

SOX7;R10;CELF2;HP1BP3;ZBTB20;TCF20;RORA;MSANTD4;ZC3H6;BMI1;CHD2;PHF6;TNFSF13B;R10;CELF2;HP1BP3;ZBTB20;TCF20;RORA;MSANTD4;ZC3H6;BMI1;CHD2;PHF6;SUMO3;HC

K5;DACT1;ACTR3;KLF10;MEF2C;KLF12;ZFP91;FOXP2;AEBP2;MTF2;NCOA7;ITGA6;PHF21A;RNF111;GABPA;SOX5;KLF10;MEF2C;KLF12;DYRK1A;ZFP91;RGMB;FOXP2;AEBP2;MTF2;MEF2C;DR1;SMARCA5;DYRK1A;ESRRG;INHBA;RGMB;VEGFA;HIPK2;KLF7;LHX1;MTF2;NCOA5;INHBA;VEGFA;HIPK2;KLF7;MTF2;NCOA7;ITGA6

FX1;BRMS1L;MTF2;MXD1;RCOR1;FRK

DUSP6;RAB11A;FBXW2;HIPK2;COPS2;PKN2;KBTBD7;FRK  
1

DXB1;MEF2C;KLF12;ESRRG;FOXP2;KLF7;MXD1

EAD1;GABPA;ZKSCAN1;SOX5;ZBTB7C

D4A;PRPF4B;DHX40;XPOT;CANX;PKN2;MATR3;PABPC1;NAA15  
XB1;MEF2C;KLF12;ESRRG;FOXP2;KLF7;LHX1;MXD1

MAP1LC3B;SUMO3;NCS1;DAG1;HOXA3;TRIM24;TIMP3;TLK1;KPNA4;ARIH1;ZNF644;TNPO1;HOXA3;TRIM24;TIMP3;TLK1;KPNA4;ARIH1;ZNF644;TNPO1;SOX7;CNPPD1;RNF111;GABPA;S

A;PURA;HMBOX1;E2F3;ZNF148;ZKSCAN1;ZBTB7C;SMAD2;FOXB1;ZNF462;DR1;SMARCA:  
2;NCOA7;PPP2CA;PURA;HMBOX1;ATXN1L;E2F3;ZNF148;ZKSCAN1;ZBTB7C;WNT4;SMAI  
COA7;ITGA6;NAA15

O1;SOX7;CNPPD1;RNF111;GABPA;SOX5;ANKS1B;AGFG1;SKP1;DACT1;ACTR3;KLF10;ME  
SOX5;SKP1;DACT1;ACTR3;KLF10;MEF2C;REXO1;DYRK1A;ZFP91;PRPF4B;FBXO11;RAD23

5;ESRRG;INHBA;VEGFA;HIPK2;KLF7;LHX1;BRMS1L;MXD1;RCOR1;FRK  
D2;FOXB1;SMARCA5;ESRRG;INHBA;VEGFA;HIPK2;KLF7;LHX1;NAA15;MXD1;RCOR1

F2C;REXO1;DYRK1A;ZFP91;PRPF4B;FBXO11;RAD23B;FOXP2;PISD;RAB30;RNF169;MTF2;  
B;FOXP2;PISD;RNF169;MTF2;HAT1;NCOA7;MATR3;TMBIM6;PABPC1;CCNO;UBA6;MGRN

HAT1;RAPGEF1;NCOA7;MATR3;TMBIM6;PABPC1;CCNO;UBA6;MGRN1;DCUN1D1;STC1;/  
1;DCUN1D1;STC1;NREP;OAZ2;GMCL1;MIPOL1;PPP2CA;PURA;HMBOX1;CAND1;SERTAD

ABHD5;NREP;OAZ2;GMCL1;MIPOL1;PPP2CA;PURA;HMBOX1;CAND1;SERTAD2;ATXN1L;  
2;ATXN1L;MAPK1;E2F3;IGF2BP2;SF3B1;SMAD2;FOXB1;ZNF462;RYK;SMARCA5;RANBP6



MAPK1;E2F3;IGF2BP2;SF3B1;SMAD2;FOXB1;ZNF462;RYK;YIPF4;SMARCA5;ATP2B1;RAN;  
;NAP1L5;HIPK2;KLF7;LHX1;PKN2;NAA15;RCOR1;FRK

BP6;RAB11A;NAP1L5;HIPK2;KLF7;LHX1;PKN2;NAA15;RCOR1;FRK
